# Supplementary material for: A new lead-free 1D hybrid copper perovskite and its structural, thermal, vibrational, optical and magnetic characterization
Source: Royal Society of Chemistry journal article supplement (doi:10.1039/d0tc05948j), 2021-01-01
Supplement: d0tc05948j1.pdf [file d0tc05948j1.pdf]

## Supplementary Data

### A new lead-free 1D hybrid copper perovskite with structural, thermal, vibrational, optic and magnetic characterizations

Mansoura Bourwina<sup>a</sup>, Rawia Msalmi<sup>a</sup>, Sandra Walha<sup>a</sup>, Mark M. Turnbull<sup>b</sup>, Thierry Roisnel<sup>c</sup>, Ferdinando Costantino<sup>d</sup>, Edoardo Mosconi<sup>e</sup> and Houcine Naïli<sup>a\*</sup>

<sup>a</sup>. *Laboratory Physico Chemistry of the Solid State, Department of Chemistry, Faculty of Sciences of Sfax, Sfax University, Tunisia.*

<sup>b</sup>. *Carlson School of Chemistry and Biochemistry, Clark University, Worcester, MA 01610, USA.*

<sup>c</sup>. *Uni Rennes, CNRS, ISCR (Institut des Sciences Chimiques de Rennes), UMR6226, 35000 Rennes, France.*

<sup>d</sup>. *Department of Chemistry, Biology and Biotechnologies, University of Perugia. Via Elce di Sotto 8, 06124, Perugia, Italy.*

<sup>e</sup>. *Computational Laboratory for Hybrid/Organic Photovoltaics (CLHYO), Istituto CNR di Scienze e Tecnologie Chimiche "Giulio Natta" (CNR-SCITEC), Via Elce di Sotto 8, 06123 Perugia, Italy.*

#### Thermal properties

The TGA plot shows that the decomposition of the precursor proceeds through two stages. The studied compound is stable up to about 182°C. At this temperature until 249°C we observe the first weight loss of 11.2%, in agreement with the departure of one chloride ion as HCl due to atmospheric moisture (theoretical weight loss of 11.5%)<sup>1</sup>. This decomposition process is accompanied by two endothermic peaks on the DTA curve at 213 and 237°C, respectively. The second transformation occurs in the temperature range 248–452°C (observed mass loss 54.32%, calculated mass loss 52.2%) which can be assigned to the degradation of the organic fragment (C<sub>5</sub>H<sub>12</sub>N<sub>2</sub>) and the departure of one additional molecule of hydrogen chloride, leading most likely to the formation of CuCl<sub>2</sub>. This decomposition process is accompanied by an intense endothermic peak on the DTA curve at 337°C.

**Table S1:** Experimental conditions and data collection of the (C<sub>5</sub>H<sub>14</sub>N<sub>2</sub>)[CuCl<sub>4</sub>] crystal.

|                                                          |                                                                      |
|----------------------------------------------------------|----------------------------------------------------------------------|
| Empirical formula                                        | (C <sub>5</sub> H <sub>14</sub> N <sub>2</sub> )[CuCl <sub>4</sub> ] |
| Formula weight (g/mol <sup>-1</sup> )                    | 307.52                                                               |
| Space group                                              | <i>P</i> 2 <sub>1</sub> / <i>n</i>                                   |
| Crystal system                                           | Monoclinic                                                           |
| <i>a</i> (Å)                                             | 6.0751(3)                                                            |
| <i>b</i> (Å)                                             | 15.6732(8)                                                           |
| <i>c</i> (Å)                                             | 12.0466(7)                                                           |
| β (°)                                                    | 98.521(2)                                                            |
| <i>V</i> (Å <sup>3</sup> )                               | 1134.37(10)                                                          |
| <i>Z</i>                                                 | 4                                                                    |
| Crystal size (mm <sup>3</sup> )                          | 0.41 × 0.03 × 0.02                                                   |
| Crystal color and shape                                  | Yellow thin stick                                                    |
| λ (MoKα) (Å)                                             | 0.71073                                                              |
| Absorption correction                                    | Multi-scan                                                           |
| Transmission factors                                     | 0.945, 0.754                                                         |
| <i>hkl</i> range                                         | -7 ≤ <i>h</i> ≤ 7<br>-20 ≤ <i>k</i> ≤ 20<br>-15 ≤ <i>l</i> ≤ 15      |
| Programs system                                          | SHELXL-2018 and SHELXT-2015                                          |
| θ range for data collection (deg)                        | 3.11-27.48                                                           |
| Diffractometer                                           | D8 VENTURE Bruker AXS                                                |
| No. of reflection collected                              | 9644                                                                 |
| No. of independent reflection                            | 2608                                                                 |
| No. of reflections observed ( <i>I</i> > 2σ( <i>I</i> )) | 2341                                                                 |
| <i>R</i> <sub>int</sub>                                  | 0.0294                                                               |
| No. of parameters                                        | 121                                                                  |
| Goodness of fit                                          | 1.09                                                                 |
| <i>R</i> indices ( <i>I</i> > 2σ( <i>I</i> ))            | <i>R</i> <sub>1</sub> = 0.0388 <i>wR</i> <sub>2</sub> = 0.1013       |
| <i>R</i> indices (all data)                              | <i>R</i> <sub>1</sub> = 0.0433 <i>wR</i> <sub>2</sub> = 0.1042       |

**Table S2:** Structural parameters of  $(C_5H_{14}N_2)[CuCl_4]$ , (Distances in Å and angles in °).

| <b>CuCl<sub>6</sub> octahedron anion</b> |           | <b>C<sub>5</sub>H<sub>14</sub>N<sub>2</sub> organic cation</b> |          |
|------------------------------------------|-----------|----------------------------------------------------------------|----------|
| Cu-Cl1                                   | 2.3383(8) | C1-C2                                                          | 1.452(7) |
| Cu-Cl2                                   | 2.2838(8) | C2-C3                                                          | 1.523(6) |
| Cu-Cl3                                   | 2.3323(8) | C4-C6                                                          | 1.506(5) |
| Cu-Cl4                                   | 2.2585(9) | N1-C1                                                          | 1.482(5) |
| Cu-Cl2 <sup>i</sup>                      | 3.0570(9) | N1-C5                                                          | 1.494(4) |
| Cu-Cl2 <sup>ii</sup>                     | 3.0442(9) | N2-C3                                                          | 1.493(5) |
| Cl1-Cu-Cl2                               | 88.96(3)  | N2-C4                                                          | 1.489(4) |
| Cl1-Cu-Cl3                               | 177.83(3) | C1-C2-C3                                                       | 117.8(4) |
| Cl1-Cu-Cl4                               | 90.45(3)  | C2-C1-N1                                                       | 116.5(4) |
| Cl2 <sup>ii</sup> -Cu-Cl3                | 89.54(3)  | C1-N1-C5                                                       | 116.3(3) |
| Cl2-Cu-Cl4                               | 179.25(4) | C4-N2-C3                                                       | 118.9(3) |
| Cl3-Cu-Cl4                               | 91.05(3)  | N1-C5-C4                                                       | 114.3(2) |
| Cl1-Cu-Cl2 <sup>i</sup>                  | 88.80(3)  | N2-C4-C5                                                       | 113.3(3) |
| Cl2 <sup>i</sup> -Cu-Cl2                 | 84.62(1)  | N2-C3-C2                                                       | 115.6(3) |
| Cl3-Cu-Cl2 <sup>i</sup>                  | 89.50(3)  |                                                                |          |
| Cl4-Cu-Cl2 <sup>i</sup>                  | 95.84(3)  |                                                                |          |
| Cl2 <sup>ii</sup> -Cu-Cl2 <sup>i</sup>   | 169.38(3) |                                                                |          |
| Cl1-Cu-Cl2 <sup>ii</sup>                 | 90.03(3)  |                                                                |          |
| Cl2 <sup>ii</sup> -Cu-Cl2                | 84.80(3)  |                                                                |          |
| Cl3-Cu-Cl2 <sup>ii</sup>                 | 91.40(3)  |                                                                |          |
| Cl4-Cu-Cl2 <sup>ii</sup>                 | 94.73(3)  |                                                                |          |

**Symmetry codes :** (i) 1-x, 1-y, 1-z ; (ii) -x, 1-y, 1-z

**Table S3:** Hydrogen bonding data

| D-H...A                       | D-H  | H...A | D...A    | D-H...A |
|-------------------------------|------|-------|----------|---------|
| N1-H1A.... Cl1 <sup>iii</sup> | 0.91 | 2.34  | 3.165(3) | 150.7   |
| N1-H1B ....Cl1 <sup>iv</sup>  | 0.91 | 2.36  | 3.219(3) | 157.6   |
| N2 - H2A....Cl3 <sup>ii</sup> | 0.91 | 2.27  | 3.169(3) | 169.3   |
| N2 - H2B....Cl1               | 0.91 | 2.81  | 3.277(3) | 113.0   |
| N2 - H2B....Cl2               | 0.91 | 2.55  | 3.117(3) | 120.7   |
| N2 - H2B....Cl3 <sup>i</sup>  | 0.91 | 2.47  | 3.186(3) | 135.6   |

**Symmetry codes :** (i)  $1-x, 1-y, 1-z$  ; (ii)  $-x, 1-y, 1-z$  ; (iii)  $x-1/2, -y+1/2, z+1/2$  ;

(iv)  $x+1/2, -y+1/2, z+1/2$

**Table S4:** IR band assignment of  $(C_5H_{14}N_2)[CuCl_4]$ 

| IR    | Assignment*     |
|-------|-----------------|
| 3390  | $\nu_a(NH_2)$   |
| 3036  | $\nu_s(NH_2)$   |
| 2849  | $\nu(CH_2)$     |
| 1634  | $\delta(NH_2)$  |
| 15531 | $\delta(CH_2)$  |
| 1445  | $\omega(NH_2)$  |
| 1411  | $\omega(CH_2)$  |
| 1323  | $\nu(C-N)$      |
| 1125  | $\nu(C-N)$      |
| 1069  | $\nu_a(C-C)$    |
| 1027  | $\nu_s(C-C)$    |
| 972   | $\rho(NH_2)$    |
| 864   | $\delta(C-C-C)$ |
| 767   | $\delta(C-C-N)$ |
| 417   | $\delta(C-N-C)$ |

\* $\nu$ : stretching.  $\nu_a$ : asymmetric stretching.  $\nu_s$ : symmetric stretching.  $\delta$ : scissoring.  $\omega$ : wagging.

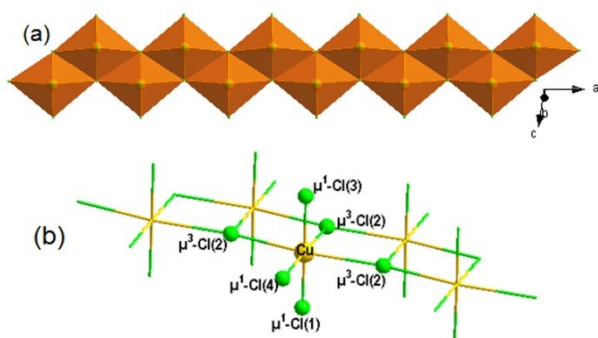

**Figure S1:** Description of a single inorganic chain. (a) Projection of a single chain along [010]. (b) Description of Cl ions environment

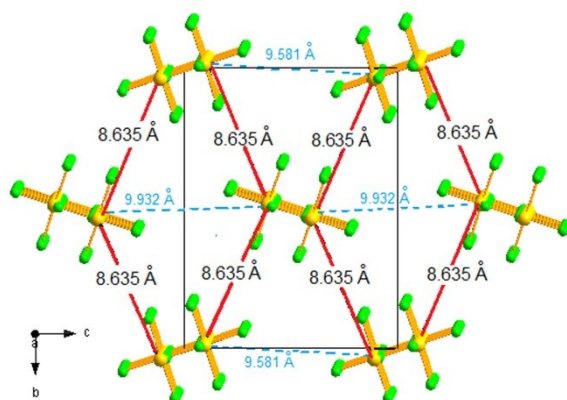

**Figure S2:** Inter-chains distances in different direction in the (b, c) plan.

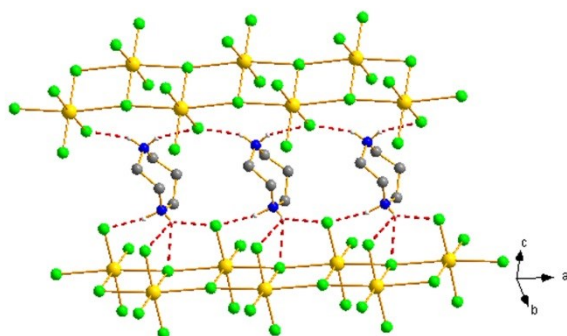

**Figure S3:** Hydrogen bonds between organic and inorganic frameworks (H...Cl represented as dashed red lines).

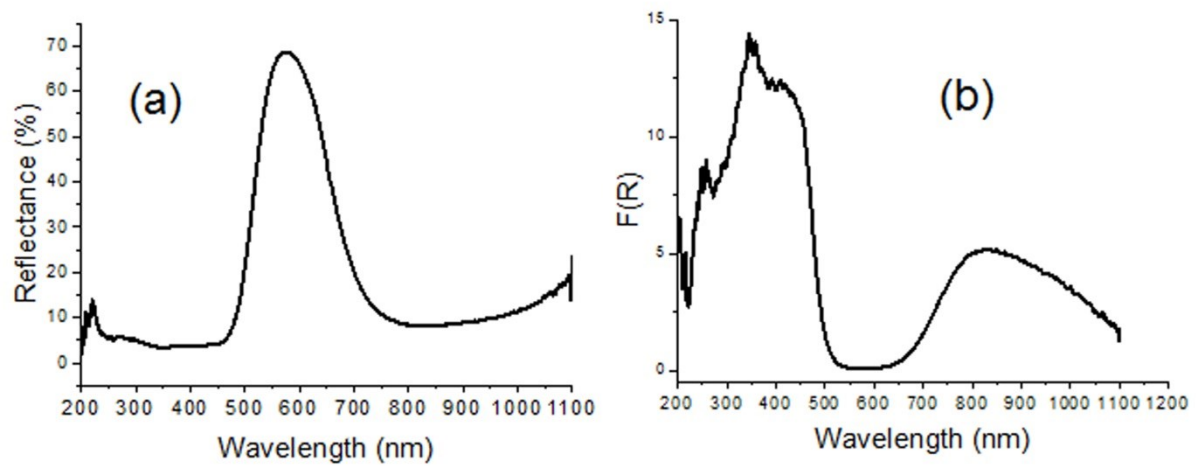

**Figure S4:** (a) Reflectance and (b) K-M absorption of  $(C_5H_{14}N_2)[CuCl_4]$ .
